# Supplementary material
Source: PubMed Central journal article supplement (PMC6311495)
Supplement: supp_RA118.005579_140411_2_supp_224962_phywwy.pdf [file supp_RA118.005579_140411_2_supp_224962_phywwy.pdf]

# The long noncoding RNA LOC105374325 causes podocyte injury in individuals with focal segmental glomerulosclerosis

Shuai Hu<sup>1#</sup>, Runhong Han<sup>1,2#</sup>, Jingsong Shi<sup>1</sup>, Xiaodong Zhu<sup>1</sup>, Weisong Qin<sup>1</sup>, Caihong Zeng<sup>1</sup>, Hao Bao<sup>1\*</sup> and Zhihong Liu<sup>1\*</sup>

<sup>1</sup> National Clinical Research Center of Kidney Diseases, Jinling Hospital, Nanjing University School of Medicine, Nanjing, 210002, China

<sup>2</sup> School of Medicine, Southeast University, Nanjing, 210009, China

**Running title:** Role of lncRNA LOC105374325 in podocytes of FSGS

## Correspondence:

\* Hao Bao, M.D., National Clinical Research Center of Kidney Diseases, Jinling Hospital, Nanjing University School of Medicine, 305 East Zhong Shan Road, Nanjing 210002, China. Phone: 86-25-84801992; Fax: 86-25-84801992; E-mail: bhao@nju.edu.cn

\* Zhihong Liu, M.D., National Clinical Research Center of Kidney Diseases, Jinling Hospital, Nanjing University School of Medicine, 305 East Zhong Shan Road, Nanjing 210002, China. Phone: 86-25-84801992; Fax: 86-25-84801992; E-mail: zhihong--liu@hotmail.com

# Co-first authors

\* Co-corresponding authors

## Supporting information

**Table S1.** Oligomers used in this study

**Table S2.** Antibodies used in this study

**Figure S1.** Absolute quantification of LOC105374325, miR-34c and miR-196a/b in podocytes.

**Figure S2.** The binding between mmu-miR-34c and mmu-Bax 3' UTR and the binding between mmu-miR-196a/b and mmu-Bak 3' UTR.

## Tables

**Table S1. Oligomers used in this study**

| Name                       | Application | Primer list                           |
|----------------------------|-------------|---------------------------------------|
| LOC105374325-F             | PCR         | GTCACCTGTGGCCCTATTT                   |
| LOC105374325-R             | PCR         | CAGACGAGGCCATAGAAGTTAG                |
| hsa-ACTB-F                 | PCR         | GACCTGACTGACTACCTCATGAAGAT            |
| hsa-ACTB-R                 | PCR         | GTCACACTTCATGATGGAGTTGAAGG            |
| hsa-Bax-F                  | PCR         | CCCGAGAGGTCTTTTTCCGAG                 |
| hsa-Bax-R                  | PCR         | CCAGCCCATGATGGTTCTGAT                 |
| hsa-Bak-F                  | PCR         | CATCAACCGACGCTATGACTC                 |
| hsa-Bak-R                  | PCR         | GTCAGGCCATGCTGGTAGAC                  |
| hsa-pri-miR-34c-F          | PCR         | TGGGGTACCAACTTGAGACTG                 |
| hsa-pri-miR-34c-R          | PCR         | TTTGGACGAATTCCTCAAATC                 |
| hsa-pri-miR-196a-F         | PCR         | AGTAACTGCCGTGAATCGGG                  |
| hsa-pri-miR-196a-R         | PCR         | GTAAAGCCGCTTTTTGGCCC                  |
| hsa-pri-miR-196b-F         | PCR         | GCTGTTCGAGAGAAAGGTGGA                 |
| hsa-pri-miR-196b-R         | PCR         | CCCCTTCCTTGACGCATTTG                  |
| mmu-pri-miR-34c-F          | PCR         | AGTCTGAGAGCACCAGCTAAA                 |
| mmu-pri-miR-34c-R          | PCR         | CTATGGCTCTGTCCTCACCA                  |
| mmu-pri-miR-196a-F         | PCR         | CCGGGACTGTTGAGTGAAGT                  |
| mmu-pri-miR-196a-R         | PCR         | TTTTGCAGGGGGAAGTACA                   |
| mmu-pri-miR-196b-F         | PCR         | GCTGTTCGAGAGAAAGGTGGA                 |
| mmu-pri-miR-196b-R         | PCR         | AGGGTGGTGTCTGGTACAGG                  |
| mmu-ACTB-F                 | PCR         | GGCTGTATCCCCTCCATCG                   |
| mmu-ACTB-R                 | PCR         | CCAGTTGGTAACAATGCCATGT                |
| LOC105374325-DNA-sense     | pull down   | (biotin-)GGTCCAGGGGACAGCTTGCCAGG<br>A |
| LOC105374325-DNA-antisense | pull down   | (biotin-)TCCTGGCAAGCTGTCCCCTGGAC<br>C |
| ChIP-C/EBP $\beta$ -F      | ChIP        | CAGCAAAGGAACGGAACAGA                  |
| ChIP-C/EBP $\beta$ -R      | ChIP        | TGATGGATGTTTCATGGCTCAC                |

**Table S2. Antibodies used in this study**

| Antibody         | Catalog no. | Company    | Reactivity   |
|------------------|-------------|------------|--------------|
| BAX              | ab32503     | Abcam      | Human, Mouse |
| BAK              | 12105       | CST        | Human, Mouse |
| Phospho-p38      | 4511        | CST        | Human        |
| p38              | ab31828     | Abcam      | Human        |
| p-C/EBP $\beta$  | ab52194     | Abcam      | Human        |
| C/EBP $\beta$    | PA5-27244   | Invitrogen | Human        |
| $\beta$ -tubulin | ab6046      | Abcam      | Human        |
| WT1              | ab89901     | Abcam      | Human, Mouse |
| $\beta$ -actin   | ab8227      | Abcam      | Human        |

## Figures

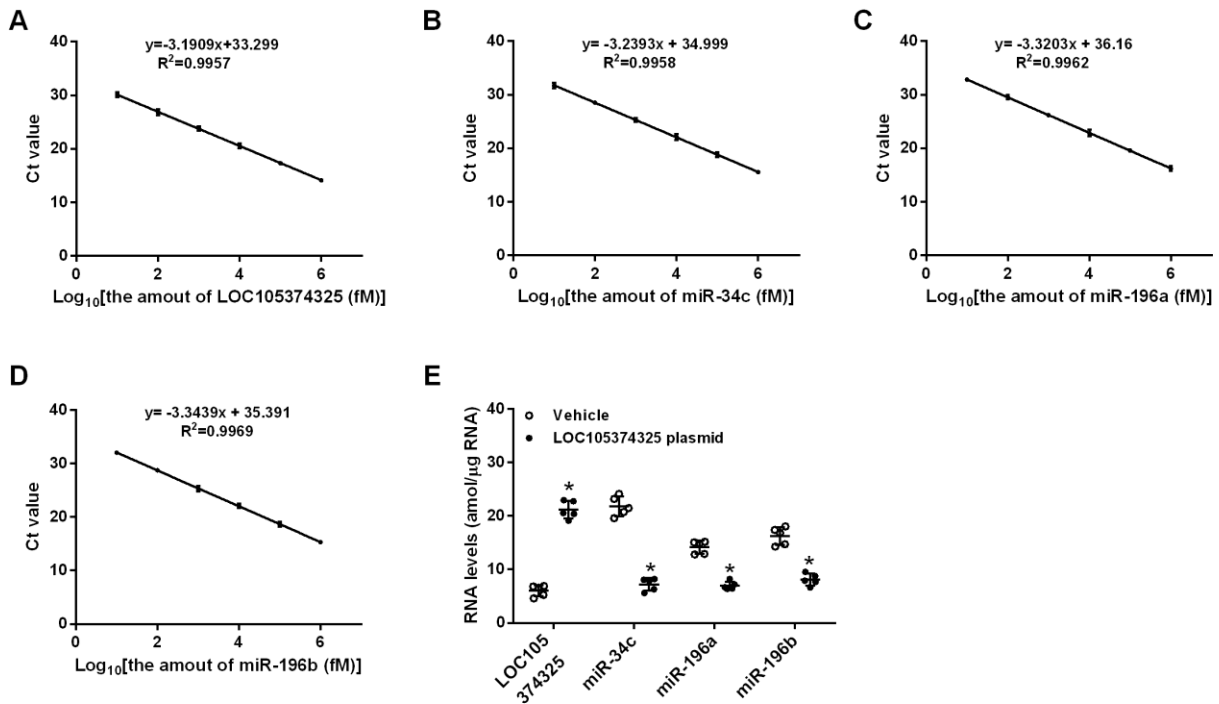

**Figure S1. Absolute quantification of LOC105374325, miR-34c and miR-196a/b in podocytes (A-D)**, The standard curves of LOC105374325, miR-34c and miR-196a/b generated by linear regression analysis of  $\log_{10}$ (concentration) and Ct values; **(E)**, Change of absolute level of LOC105374325, miR-34c and miR-196a/b in podocytes transfected LOC105374325 plasmid (n=5). For statistical analysis, a two-tailed Student's t-test was used for **E**. \*,  $P < 0.05$  compared with control.

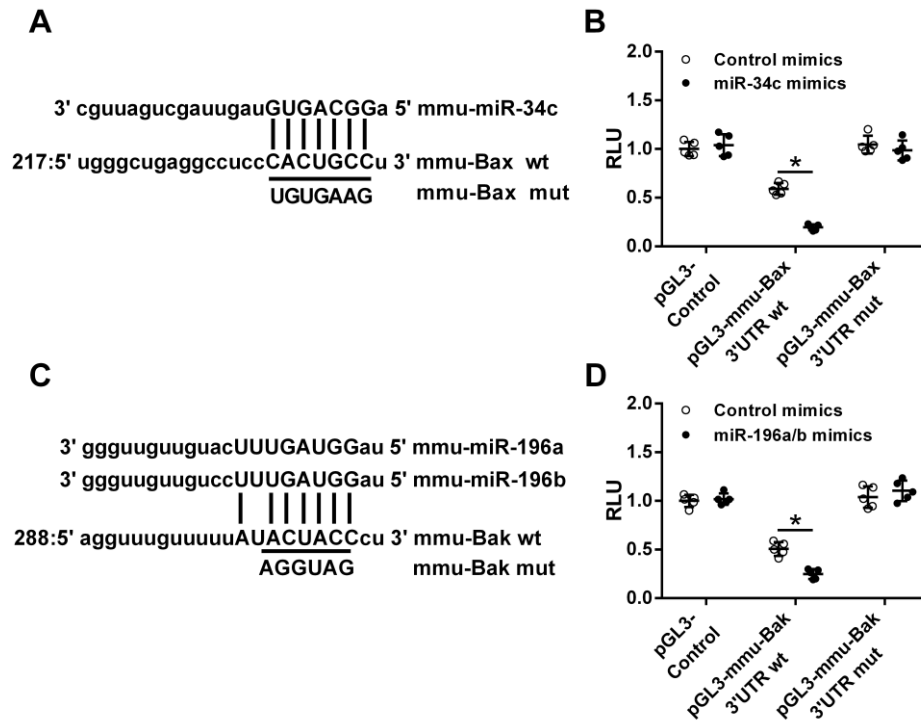

**Figure S2. The binding between mmu-miR-34c and mmu-Bax 3' UTR and the binding between mmu-miR-196a/b and mmu-Bak 3' UTR** (A) The binding site in the 3' UTR of mmu-Bax mRNA targeted by miR-34c; (B) Normalized luciferase activity of reporter constructs containing the 3' UTR of mmu-Bax or mutant 3' UTR of mmu-Bax in podocytes cotransfected with miR-34c mimics (n=5); (C) The binding site in the 3' UTR of mmu-Bak mRNA targeted by miR-196a/b; (D) Normalized luciferase activity of reporter constructs containing the 3' UTR of mmu-Bak or mutant 3' UTR of mmu-Bak in podocytes cotransfected with miR-196a/b mimics (n=5). For statistical analysis, a two-tailed Student's t-test was used for B and D. \*,  $P < 0.05$  compared with cells transfected with pGL3-mmu-Bax 3'UTR wt or pGL3-mmu-Bak 3'UTR wt plasmid.
